# Supplementary material for: Determining the Sites of Neural Adaptations to Resistance Training: A Systematic Review and Meta-analysis
Source: Springer Nature journal article supplement (doi:10.1007/s40279-020-01258-z), 2020-01-28
Supplement: MOESM1 [file 17602720]

**Table S1:** Search strategy examples used to yield the neural adaptations to resistance training.

| MEDLINE (Ovid) | Scopus |
| --- | --- |
| 1. Resistance training (inc related terms) 2. Limit 1 to (English language and full text and humans and yr=”1970-current”) 3. Exercise (inc related terms) 4. Limit 3 to (English language and full text and humans and yr=”1970-current”) 5. Strength training (inc related terms) 6. Limit 5 to (English language and full text and humans and yr=”1970-current”) 7. Transcranial magnetic stimulation (inc related terms) 8. Limit 7 to (English language and full text and humans and yr=”1970-current”) 9. Motor evoked potential* (inc related terms) 10. Cervicomedullary evoked potential*(inc related terms) 11. Limit 9 to (English language and full text and humans and yr=”1970-current”) 12. Cortical silent period (inc related terms) 13. Limit 11 to (English language and full text and humans and yr=”1970-current”) 14. Intracortcial inhibition (inc related terms) 15. Limit 13 to (English language and full text and humans and yr=”1970-current”) 16. Hoffman reflex (inc related terms) 17. Limit 15 to (English language and full text and humans and yr=”1970-current”) 18. Voluntary activation (inc related terms) 19. Limit 17 to (English language and full text and humans and yr=”1970-current”) 20. #2 or #4 or #6 21. #8 and #15 22. #10 and #15 23. #12 and #15 24. #14 and #15 25. #16 and #17 26. #18 and#19 | 1. (TS=resistance training) AND Language: (English) AND Document types: (Article). Indexes = Sci-Expanded, ESCI, CCR-Expanded, IC Timespan = 1990-2016 2. (TS=exercise) AND Language: (English) AND Document types: (Article). Indexes = Sci-Expanded, ESCI, CCR-Expanded, IC Timespan = 1990-2016 3. (TS=strength training) AND Language: (English) AND Document types: (Article). Indexes = Sci-Expanded, ESCI, CCR-Expanded, IC Timespan = 1990-2016 4. #3 or #2 or #1. Indexes = Sci-Expanded, ESCI, CCR-Expanded, IC Timespan = 1990-2016 5. (TS=transcranial magnetic stimulation) AND Language: (English) AND Document types: (Article). Indexes = Sci-Expanded, ESCI, CCR-Expanded, IC Timespan = 1990-2016 6. (TS=motor evoked potential*) AND Language: (English) AND Document types: (Article). Indexes = Sci-Expanded, ESCI, CCR-Expanded, IC Timespan = 1990-2016 7. (TS=cortical silent period) AND Language: (English) AND Document types: (Article). Indexes = Sci-Expanded, ESCI, CCR-Expanded, IC Timespan = 1990-2016 8. (TS=intracortical inhibition) AND Language: (English) AND Document types: (Article). Indexes = Sci-Expanded, ESCI, CCR-Expanded, IC Timespan = 1990-2016 9. #5 and #4 10. #6 and #4 11. #7 and #4 12. #8 and #4 |
